# Supplementary material
Source: Springer Nature journal article supplement (https://www.springermedizin.de/resource/supplementary/12955_2007_372_MOESM4_ESM.pdf/9560266)

Item: tearful [CES10] - 2 Levels for Person Factor: GENDER

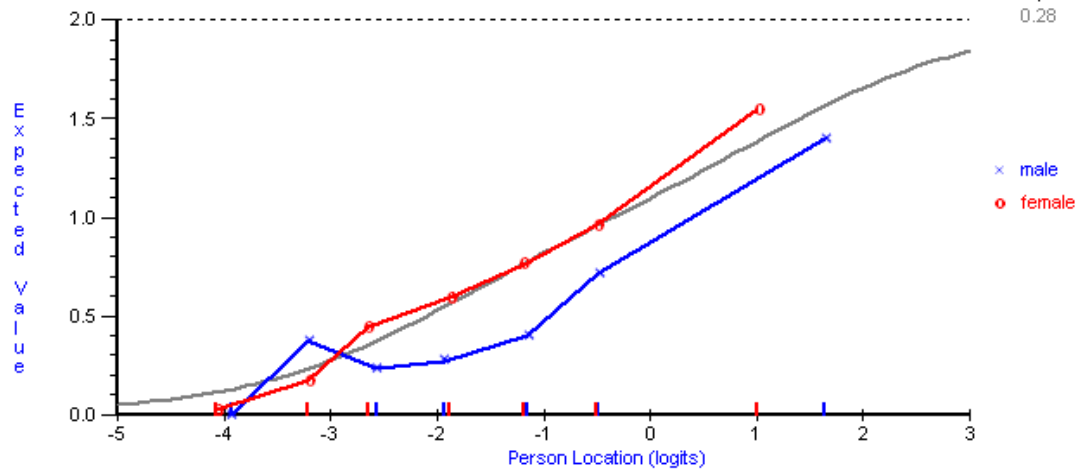

Supplement: MOESM4 [file 9560266]
